# Supplementary material for: Determination of Major and Trace Metals in Date Palm Fruit (Phoenix dactylifera) Samples Using Flame Atomic Absorption Spectrometry and Assessment of the Associated Public Health Risks
Source: Int J Anal Chem. 2024 Jan 23;2024:9914300. doi: 10.1155/2024/9914300 (PMC11325699; doi:10.1155/2024/9914300)
Supplement: Supplementary Materials — Supplementary 1. Table S1: the detection and quantification limits of the instrument for the determination of metals in date palm fruit samples. Supplementary 2. Table S2: recovery test result (N = 3) for the determination of four metals in date palm fruit samples using the FAAS method. [file 9914300.f1.docx]

**Supplementary Material**

**Determination of Major and Trace Metals in Date Palm Fruit (*Phoenix Dactilifera*)** **Samples Using Flame Atomic Absorption Spectrometry and Assessment of the Associated Public Health Risks**

**Feven Tamirat1, Wondimeneh Dubale Adane1, Merid Tessema1*, Endale Tesfaye2, Gizaw Tesfaye3,**

1Department of Chemistry, College of Natural and Computational Sciences, Addis Ababa University, P.O. Box 1176, Addis Ababa, Ethiopia

2Department of Chemistry, College of Natural and Computational Sciences, Gambella University, P.O. Box 126, Gambella, Ethiopia

3Department of Chemistry, Fitche College of Teacher Education, P.O. Box 260, Fitche, Ethiopia

*Corresponding author. E-mail: [tessmer2265@yahoo.com](mailto:tessmer2265@yahoo.com)

Table S1: The detection and quantification limits of the instrument for the determination of metals in date palm fruit samples.

| Metal | LOD* (mg/kg) | LOQ* (mg/kg) |
| --- | --- | --- |
| Na | 12 | 40 |
| Ca | 0.55 | 1.82 |
| Ni | 0.83 | 2.74 |
| Zn | 0.36 | 1.20 |
| Fe | 0.21 | 0.70 |
| Mn | 0.44 | 1.47 |
| Cu | 0.13 | 0.43 |
| Pb | 0.05 | 0.17 |
| Cd | 0.07 | 0.23 |

*LOD: Limit of detection; *LOQ: limit of quantification

Table S2: Recovery test result (N=3) for the determination of four metals in date palm fruit samples using the FAAS method.

| Elements | Original concentration  in the sample (mg/kg) | Concentration  added (mg/kg) | Concentration  detected (mg/kg) | % Recovery |
| --- | --- | --- | --- | --- |
| Na | 9.58 | 4.79 | 14.3 | 98.5 |
| Ca | 299 | 74.7 | 369 | 93.7 |
| Fe | 115 | 40.3 | 152 | 91.8 |
| Zn | 224 | 56.0 | 275 | 91.1 |
